# Supplementary material for: Fabrication of magnetite nanoparticle doped reduced graphene oxide grafted polyhydroxyalkanoate nanocomposites for tissue engineering application
Source: Royal Society of Chemistry journal article supplement (doi:10.1039/c6ra03233h), 2016-01-01
Supplement: c6ra03233h1.pdf [file c6ra03233h1.pdf]

### Supporting Information

#### **Fabrication of magnetite nanoparticles doped reduced graphene oxide grafted polyhydroxyalkanoate nanocomposite for tissue engineering application**

Nilkamal Pramanik<sup>1</sup>, Ranjan Kumar Basu<sup>3</sup>, Jibankrishna De<sup>4</sup>, Tanmoy Rath\*<sup>1, 2</sup>, Patit Paban Kundu\*<sup>1</sup>

<sup>1</sup> Department of Polymer Science & Technology, University of Calcutta, West Bengal -700073, India,

<sup>2</sup> Central Institute of Plastics Engineering and Technology (CIPET), Bhubaneswar-751024, India.

<sup>3</sup> Department of Chemical Engineering, University of Calcutta, West Bengal-700073, India.

<sup>4</sup> Department of Radiodiagnosis, Nil Ratan Sirkar Hospital and Medical College, West Bengal-700014, India.

\*Corresponding author, E mail: [ppk923@yahoo.com](mailto:ppk923@yahoo.com); [tanmayrath@gmail.com](mailto:tanmayrath@gmail.com)

**Phone and fax:** 91-33-2352-5106.

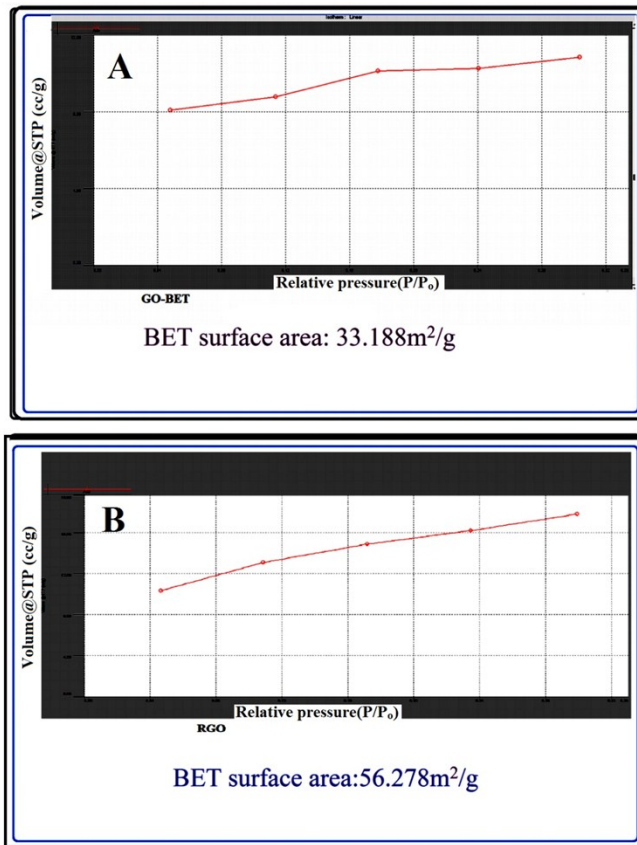

**ESI Figure 1:** BET analysis of graphite oxide (A) and reduced graphene oxide (B).

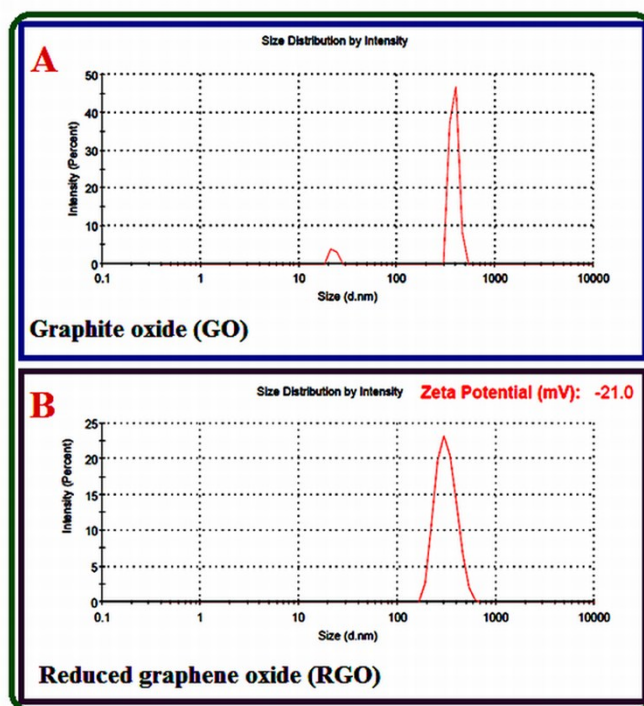

**ESI Figure 2:** Particles size analysis of graphite oxide (A) and reduced graphene oxide (B).

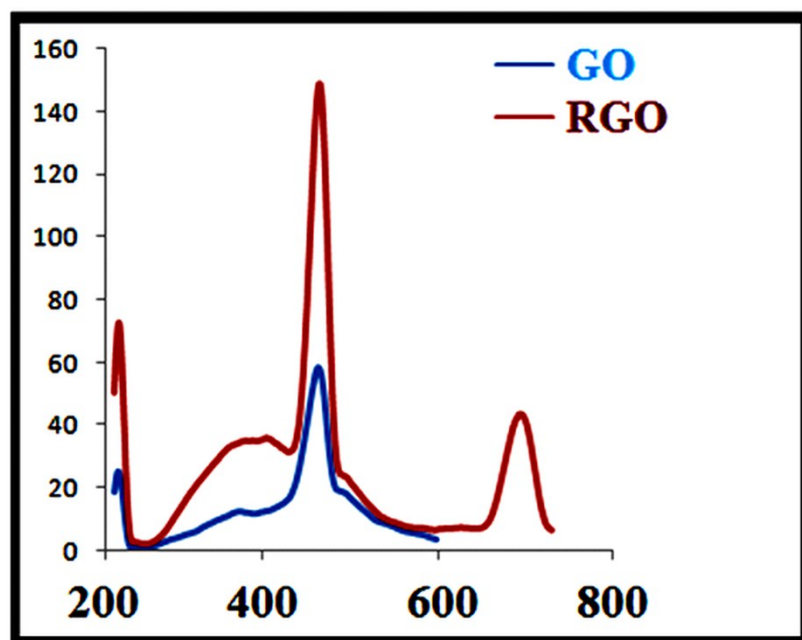

**ESI Figure 3:** Fluorescence spectra of graphite oxide and reduced graphene oxide.
